# Supplementary material for: Semaphorin-1a prevents Drosophila olfactory projection neuron dendrites from mis-targeting into select antennal lobe regions
Source: PubMed Central journal article supplement (PMC5426794; doi:10.1371/journal.pgen.1006751), 2017-04-27
Supplement: pgen.1006751.s011.pdf [file pgen.1006751.s011.pdf]

**S1 Table: Phenotypic description of PN in wild-type, *Sema-1a* LOF and rescue experiments in S4 and S6 Figures**

|                                                                                     | type of PN (emb/larval) <sup>a</sup> | conditions of <i>Sema-1a</i> expression | total number (n) | % of obvious dendritic mis-targeting | % of dendritic occupancy in Brp negative regions and/or partial glomerulus | % of other dendritic mis-targeting | notes                                                                                                                                   |
|-------------------------------------------------------------------------------------|--------------------------------------|-----------------------------------------|------------------|--------------------------------------|----------------------------------------------------------------------------|------------------------------------|-----------------------------------------------------------------------------------------------------------------------------------------|
| Dendrites of <i>Sema-1a</i> -deficient PNs do not mis-target into select AL regions | VA2 adPN (emb)                       | <i>wt</i>                               | 1                | 0%                                   | 0%                                                                         | 0%                                 |                                                                                                                                         |
|                                                                                     |                                      | <i>Sema-1a<sup>P1</sup></i>             | 3                | 0%                                   | 0%                                                                         | 0%                                 |                                                                                                                                         |
|                                                                                     | VM3 adPN (emb)                       | <i>wt</i>                               | 6                | 0%                                   | 0%                                                                         | 0%                                 |                                                                                                                                         |
|                                                                                     |                                      | <i>Sema-1a<sup>P1</sup></i>             | 9                | 11% <sup>b</sup>                     | 0%                                                                         | 22% <sup>d</sup>                   | <sup>b</sup> dendritic splitting (11%)<br><sup>d</sup> mis-targeting of a few dendritic arbors to the DM1 (11%) and DM5 (11%) glomeruli |
|                                                                                     | VA3 adPN (larval)                    | <i>wt</i>                               | 2                | 0%                                   | 0%                                                                         | 0%                                 |                                                                                                                                         |
|                                                                                     |                                      | <i>Sema-1a<sup>P1</sup></i>             | 5                | 40% <sup>b</sup>                     | 0%                                                                         | 0%                                 | <sup>b</sup> dendritic innervation in the ventral edge of the VM5v glomerulus                                                           |
|                                                                                     |                                      | <i>Sema-1aP1+Sema-1a</i>                | 5                | 0%                                   | 80% <sup>c</sup>                                                           | 0%                                 | <sup>c</sup> dendritic innervation in the ventral part and/or largely outside of the DL1 glomerulus (Brp negative region)               |
|                                                                                     | DL3 IPN (larval; S6 Fig.)            | <i>wt</i>                               | 13               | 0% <sup>b</sup>                      | 0%                                                                         | 0%                                 |                                                                                                                                         |
|                                                                                     |                                      | <i>Sema-1a<sup>P1</sup></i>             | 14               | 0%                                   | 0%                                                                         | 0%                                 |                                                                                                                                         |
|                                                                                     |                                      | <i>Sema-1aP1+Sema-1a</i>                | 18               | 0%                                   | 100% <sup>c</sup>                                                          | 11% <sup>d</sup>                   | <sup>c</sup> dendritic innervation outside of the DL3 glomerulus (Brp negative region)<br><sup>d</sup> dendritic splitting              |
|                                                                                     | VA4 IPN (larval)                     | <i>wt</i>                               | 2                | 0%                                   | 0%                                                                         | 0%                                 |                                                                                                                                         |
|                                                                                     |                                      | <i>Sema-1a<sup>P1</sup></i>             | 2                | 50% <sup>b</sup>                     | 0%                                                                         | 0%                                 | <sup>b</sup> dendritic splitting                                                                                                        |
|                                                                                     | VC1 IPN (larval)                     | <i>wt</i>                               | 1                | 0%                                   | 0%                                                                         | 0%                                 |                                                                                                                                         |
|                                                                                     |                                      | <i>Sema-1a<sup>P1</sup></i>             | 17               | 6% <sup>b</sup>                      | 0%                                                                         | 0%                                 | <sup>b</sup> dendritic innervation to the region ventral to the DP1m glomerulus                                                         |
|                                                                                     | VC2 IPN (larval)                     | <i>wt</i>                               | 2                | 0%                                   | 0%                                                                         | 0%                                 |                                                                                                                                         |
|                                                                                     |                                      | <i>Sema-1a<sup>P1</sup></i>             | 2                | 0%                                   | 0%                                                                         | 0%                                 |                                                                                                                                         |
|                                                                                     | VA1Im vPN (larval; S4 Fig.)          | <i>wt</i>                               | 5                | 0%                                   | 0%                                                                         | 0%                                 |                                                                                                                                         |
|                                                                                     |                                      | <i>Sema-1a<sup>P1</sup></i>             | 15               | 0%                                   | 0%                                                                         | 0%                                 |                                                                                                                                         |
| <i>Sema-1aP1+Sema-1a</i>                                                            |                                      | 8                                       | 0%               | 0%                                   | 0%                                                                         |                                    |                                                                                                                                         |
| VL1 vPN (larval; S4 Fig.)                                                           | <i>wt</i>                            | 4                                       | 0%               | 0%                                   | 0%                                                                         |                                    |                                                                                                                                         |
|                                                                                     | <i>Sema-1a<sup>P1</sup></i>          | 11                                      | 0%               | 0%                                   | 0%                                                                         |                                    |                                                                                                                                         |
|                                                                                     | <i>Sema-1aP1+Sema-1a</i>             | 3                                       | 0%               | 0%                                   | 0%                                                                         |                                    |                                                                                                                                         |

<sup>a</sup> emb:embryonic-born; larval: larval-born

<sup>b, c, d</sup> see the description in the column of notes
