# Supplementary material for: Semaphorin-1a prevents Drosophila olfactory projection neuron dendrites from mis-targeting into select antennal lobe regions
Source: PubMed Central journal article supplement (PMC5426794; doi:10.1371/journal.pgen.1006751), 2017-04-27
Supplement: pgen.1006751.s012.pdf [file pgen.1006751.s012.pdf]

**S2 Table. Generation of specific types of *Sema-1a<sup>P1</sup>* adPNs in the synchronized MARCM experiment based on their birth-order**

genotype: *hs-FLP<sup>122</sup>/+;FRT<sup>40A</sup>,UAS-mCD8::GFP,Sema1a<sup>P1</sup>,GAL4-GH146/FRT<sup>40A</sup>,tub-GAL80;+;+*

| hr ALH<br>adPN | 30-34<br>(n=15) | 34-38<br>(n=26) | 38-42<br>(n=9) | 42-46<br>(n=10) | 46-50<br>(n=8) |
|----------------|-----------------|-----------------|----------------|-----------------|----------------|
| DL1            | 100%            | 19%             | 0%             | 0%              | 0%             |
| DA3            | 0%              | 38%             | 0%             | 9%              | 10%            |
| DC2            | 0%              | 27%             | 44%            | 27%             | 0%             |
| D              | 0%              | 8%              | 56%            | 18%             | 10%            |
| VA3            | 0%              | 0%              | 0%             | 18%             | 30%            |
| DC3            | 0%              | 8%              | 0%             | 19%             | 30%            |
| VA1d           | 0%              | 0%              | 0%             | 9%              | 20%            |
