# Supplementary material for: Semaphorin-1a prevents Drosophila olfactory projection neuron dendrites from mis-targeting into select antennal lobe regions
Source: PubMed Central journal article supplement (PMC5426794; doi:10.1371/journal.pgen.1006751), 2017-04-27
Supplement: pgen.1006751.s014.pdf [file pgen.1006751.s014.pdf]

**S4 Table: Phenotypic description of PNs in *wild-type*, *Sema-1a* LOF and rescue experiments in S8 and S9 Figures**

|                                                                                                                        | type of PN (emb/larval) <sup>a</sup>    | conditions of <i>Sema-1a</i> expression       | total number (n) | % of dendritic mis-targeting in the VM7v glomerulus | % of dendritic occupancy in Brp negative regions and/or partial glomerulus | % of other dendritic mis-targeting                                                                                                                               | notes                                                                                                                                                                                                                                           |
|------------------------------------------------------------------------------------------------------------------------|-----------------------------------------|-----------------------------------------------|------------------|-----------------------------------------------------|----------------------------------------------------------------------------|------------------------------------------------------------------------------------------------------------------------------------------------------------------|-------------------------------------------------------------------------------------------------------------------------------------------------------------------------------------------------------------------------------------------------|
| <i>Sema-1a</i> -deficient PNs with a phenotype of dendritic mis-targeting to the VM7v glomerulus                       | DM1 IPN <sup>e</sup> (larval; S9 Fig.)  | <i>wt</i>                                     | 6                | 0%                                                  | 0%                                                                         | 0%                                                                                                                                                               |                                                                                                                                                                                                                                                 |
|                                                                                                                        |                                         | <i>Sema-1a</i> <sup>P1</sup>                  | 6                | 83% <sup>b</sup>                                    | 0%                                                                         | 50% <sup>d</sup>                                                                                                                                                 | <sup>b</sup> dendritic innervation in the VM7v glomerulus<br><sup>d</sup> dendritic innervation in the VA4 glomerulus (33%; one: heavy dendritic innervation; the other one: a dendritic branch) and the region around the VC1 glomerulus (17%) |
|                                                                                                                        |                                         | <i>Sema-1a</i> <sup>P1</sup> + <i>Sema-1a</i> | 7                | 0%                                                  | 14% <sup>c</sup>                                                           | 14% <sup>d</sup>                                                                                                                                                 | <sup>c</sup> dendritic innervation largely outside of the DM1m glomerulus (Brp negative region)<br><sup>d</sup> a patch of dendritic innervation ventral to the VM7v glomerulus                                                                 |
|                                                                                                                        | DM2 IPN (larval; S9 Fig.)               | <i>wt</i>                                     | 8                | 0%                                                  | 0%                                                                         | 0%                                                                                                                                                               |                                                                                                                                                                                                                                                 |
|                                                                                                                        |                                         | <i>Sema-1a</i> <sup>P1</sup>                  | 26               | 31% <sup>b</sup>                                    | 0%                                                                         | 27% <sup>d</sup>                                                                                                                                                 | <sup>b</sup> dendritic innervation in the VM7v glomerulus<br><sup>d</sup> dendritic innervation to the region posterior to the VM7d glomerulus (12%) and the region ventral to the DP1m, DM1 or DM2 glomerulus (19%)                            |
|                                                                                                                        |                                         | <i>Sema-1a</i> <sup>P1</sup> + <i>Sema-1a</i> | 8                | 0%                                                  | 100% <sup>c</sup>                                                          | 0%                                                                                                                                                               | <sup>c</sup> dendritic innervation in the dorsal (50%) or ventral (50%) part of the DM2 glomerulus                                                                                                                                              |
| <i>Sema-1a</i> -deficient PNs with a phenotype of dendritic mis-targeting to the VA4 glomerulus                        | DM1 IPN <sup>e</sup> (larval; S9 Fig.)  | <i>wt</i>                                     | 6                | 0%                                                  | 0%                                                                         | 0%                                                                                                                                                               |                                                                                                                                                                                                                                                 |
|                                                                                                                        |                                         | <i>Sema-1a</i> <sup>P1</sup>                  | 6                | 50% <sup>b</sup>                                    | 0%                                                                         | 83% <sup>d</sup>                                                                                                                                                 | <sup>b</sup> dendritic innervation in the VA4 glomerulus (33%; one: heavy dendritic innervation; the other one: a dendritic branch) and the region around the VC1 glomerulus (17%)<br><sup>d</sup> dendritic innervation in the VM7v glomerulus |
|                                                                                                                        |                                         | <i>Sema-1a</i> <sup>P1</sup> + <i>Sema-1a</i> | 7                | 0%                                                  | 14% <sup>c</sup>                                                           | 14% <sup>d</sup>                                                                                                                                                 | <sup>c</sup> dendritic innervation largely outside of the DM1m glomerulus (Brp negative region)<br><sup>d</sup> a patch of dendritic innervation ventral to the VM7v glomerulus                                                                 |
|                                                                                                                        | VA7m IPN <sup>e</sup> (larval; S9 Fig.) | <i>wt</i>                                     | 4                | 25% <sup>b</sup>                                    | 0%                                                                         | 0%                                                                                                                                                               | <sup>b</sup> a small patch of dendritic innervation to the VA4 glomerulus                                                                                                                                                                       |
|                                                                                                                        |                                         | <i>Sema-1a</i> <sup>P1</sup>                  | 9                | 67% <sup>b</sup>                                    | 0%                                                                         | 44% <sup>d</sup>                                                                                                                                                 | <sup>b</sup> dendritic innervation in part of the VA4 and/or VC2 glomeruli<br><sup>d</sup> dendritic innervation to the region close to the VC1 glomerulus                                                                                      |
|                                                                                                                        |                                         | <i>Sema-1a</i> <sup>P1</sup> + <i>Sema-1a</i> | 15               | 0%                                                  | 100% <sup>c</sup>                                                          | 0%                                                                                                                                                               | <sup>c</sup> dendritic innervation largely outside of the VA7m glomerulus (Brp negative region)                                                                                                                                                 |
| <i>Sema-1a</i> -deficient PNs with a phenotype of dendritic mis-targeting to the region ventral to the DP1m glomerulus | DL1 adPN (larval; S8 Fig.)              | <i>wt</i>                                     | 12               | 0%                                                  | 0%                                                                         | 0%                                                                                                                                                               |                                                                                                                                                                                                                                                 |
|                                                                                                                        |                                         | <i>Sema-1a</i> <sup>P1</sup>                  | 35               | 17% <sup>b</sup>                                    | 0%                                                                         | 94% <sup>d</sup>                                                                                                                                                 | <sup>b</sup> dendritic innervation to the region ventral to the DP1m glomerulus<br><sup>d</sup> dendritic mis-targeting along the DL-to-VM axis of the AL as described previously (Komiya <i>et al.</i> , 2007)                                 |
|                                                                                                                        |                                         | <i>Sema-1a</i> <sup>P1</sup> + <i>Sema-1a</i> | 12               | 0%                                                  | 100% <sup>c</sup>                                                          | 0%                                                                                                                                                               | <sup>c</sup> dendritic innervation largely outside of the DL1 glomerulus (Brp negative region)                                                                                                                                                  |
|                                                                                                                        | DL5 IPN (emb; S9 Fig.)                  | <i>wt</i>                                     | 6                | 0%                                                  | 0%                                                                         | 17% <sup>d</sup>                                                                                                                                                 | <sup>d</sup> a patch of dendritic arbors anteroventral to the DP1m glomerulus                                                                                                                                                                   |
|                                                                                                                        |                                         | <i>Sema-1a</i> <sup>P1</sup>                  | 4                | 50% <sup>b</sup>                                    | 0%                                                                         | 25% <sup>d</sup>                                                                                                                                                 | <sup>b</sup> dendritic innervation to the region ventral to the DP1m glomerulus<br><sup>d</sup> dendritic splitting                                                                                                                             |
|                                                                                                                        | DM3 adPN (emb; S9 Fig.)                 | <i>wt</i>                                     | 3                | 0%                                                  | 0%                                                                         | 0%                                                                                                                                                               |                                                                                                                                                                                                                                                 |
| <i>Sema-1a</i> <sup>P1</sup>                                                                                           |                                         | 4                                             | 25% <sup>b</sup> | 0%                                                  | 25% <sup>d</sup>                                                           | <sup>b</sup> dendritic innervation to the region ventral to the DP1m glomerulus<br><sup>d</sup> a patch of dendritic innervation posterior to the VC1 glomerulus |                                                                                                                                                                                                                                                 |

<sup>a</sup> emb: embryonic-born; larval: larval-born

<sup>b, c, d</sup> see the description in the column of notes

<sup>e</sup> same types of PNs can be also seen in different classes of dendritic mis-targeting phenotypes in Table 2 and this supporting table
