# Supplementary material for: Semaphorin-1a prevents Drosophila olfactory projection neuron dendrites from mis-targeting into select antennal lobe regions
Source: PubMed Central journal article supplement (PMC5426794; doi:10.1371/journal.pgen.1006751), 2017-04-27
Supplement: pgen.1006751.s015.pdf [file pgen.1006751.s015.pdf]

**S5 Table: Phenotypic description of PNs in *wild-type*, *Sema-1a* LOF and rescue experiments in Figures 1 and 4 and S5, S6 and S10 Figures**

|                                                                                      | type of PN (emb/larval) <sup>a</sup>     | conditions of <i>Sema-1a</i> expression       | total number (n) | % of dendritic mis-targeting to the SEZ | % of dendritic occupancy in Brp negative regions and/or partial glomerulus | % of other dendritic mis-targeting | notes                                                                                                                                                                                                                                                                                                |
|--------------------------------------------------------------------------------------|------------------------------------------|-----------------------------------------------|------------------|-----------------------------------------|----------------------------------------------------------------------------|------------------------------------|------------------------------------------------------------------------------------------------------------------------------------------------------------------------------------------------------------------------------------------------------------------------------------------------------|
| <i>Sema-1a</i> -deficient PNs with a phenotype of dendritic mis-targeting to the SEZ | DA4m adPN <sup>e</sup> (emb; S5 Fig.)    | <i>wt</i>                                     | 4                | 0%                                      | 0%                                                                         | 25% <sup>d</sup>                   | <sup>d</sup> a few dendritic arbors around the DC1 glomerulus                                                                                                                                                                                                                                        |
|                                                                                      |                                          | <i>Sema-1a</i> <sup>P1</sup>                  | 4                | 100% <sup>b</sup>                       | 0%                                                                         | 50% <sup>d</sup>                   | <sup>b</sup> dendritic innervation in the SEZ<br><sup>d</sup> partial dendritic innervation in the DA3 glomerulus                                                                                                                                                                                    |
|                                                                                      | VL2p adPN <sup>e</sup> (emb; Fig.4)      | <i>wt</i>                                     | 43               | 0%                                      | 0%                                                                         | 14% <sup>d</sup>                   | <sup>d</sup> some dendritic arbors posterior to DP1m, V or VL1 glomerulus or posterior to the AL (9%) and b a patch of dendritic arbors ventrally around the VC1 glomerulus (5%)                                                                                                                     |
|                                                                                      |                                          | <i>Sema-1a</i> <sup>P1</sup>                  | 15               | 87% <sup>b</sup>                        | 0%                                                                         | 87% <sup>d</sup>                   | <sup>b</sup> dendritic innervation to the SEZ (13% out of 87% without the innervation around the VC1 glomerulus)<br><sup>d</sup> dendritic innervation mostly to the region posterior to the VC1 glomerulus (13% out of 87% without the SEZ innervation)                                             |
|                                                                                      | DA1 IPN (larval; S6 Fig.)                | <i>wt</i>                                     | 37               | 0%                                      | 45% <sup>c</sup>                                                           | 0%                                 | <sup>c</sup> dendritic innervation in the ventral (29%) or dorsal (16%) parts of the DA1 glomerulus                                                                                                                                                                                                  |
|                                                                                      |                                          | <i>Sema-1a</i> <sup>P1</sup>                  | 27               | 19% <sup>b</sup>                        | 89% <sup>c</sup>                                                           | 26% <sup>d</sup>                   | <sup>b</sup> dendritic innervation to the region ventral to the DP1m glomerulus<br><sup>c</sup> dendritic innervation in the dorsal part of the DA1 glomerulus (89%)<br><sup>d</sup> dendritic mis-targeting along the DL-to-VM axis of the AL as described previously (Komiya <i>et al.</i> , 2007) |
|                                                                                      |                                          | <i>Sema-1a</i> <sup>P1</sup> + <i>Sema-1a</i> | 24               | 0%                                      | 100% <sup>c</sup>                                                          | 0%                                 | <sup>c</sup> dendritic innervation in the ventral part and/or outside of the DA1 glomerulus (Brp negative region)                                                                                                                                                                                    |
|                                                                                      | diffuse vPN <sup>e</sup> (larval; Fig.1) | <i>wt</i>                                     | 6                | 0%                                      | 0%                                                                         | 0%                                 |                                                                                                                                                                                                                                                                                                      |
|                                                                                      |                                          | <i>Sema-1a</i> <sup>P1</sup>                  | 4                | 100% <sup>b</sup>                       | 0%                                                                         | 100% <sup>d</sup>                  | <sup>b</sup> dendritic innervation in the SEZ<br><sup>d</sup> heavy dendritic accumulation in the DA3 glomerulus                                                                                                                                                                                     |
|                                                                                      |                                          | <i>Sema-1a</i> <sup>P1</sup> + <i>Sema-1a</i> | 7                | 0%                                      | 100% <sup>c</sup>                                                          | 29% <sup>d</sup>                   | <sup>c</sup> no/rarely dendritic innervation in the DA3 glomerulus<br><sup>d</sup> dendritic innervation across midline to the contralateral AL                                                                                                                                                      |
|                                                                                      | SEZ adPN (emb; S10 Fig.)                 | <i>Sema-1a</i> <sup>P1</sup>                  | 17               | 100% <sup>b</sup>                       | 0%                                                                         | 0%                                 | <sup>b</sup> dendritic innervation to the SEZ and no dendritic innervation in the AL                                                                                                                                                                                                                 |
|                                                                                      | SEZ adPN (larval; S10 Fig.)              | <i>Sema-1a</i> <sup>P1</sup>                  | 3                | 100% <sup>b</sup>                       | 0%                                                                         | 0%                                 | <sup>b</sup> dendritic innervation to the SEZ and no dendritic innervation in the AL                                                                                                                                                                                                                 |
|                                                                                      | SEZ IPN (larval; S10 Fig.)               | <i>Sema-1a</i> <sup>P1</sup>                  | 3                | 100% <sup>b</sup>                       | 0%                                                                         | 0%                                 | <sup>b</sup> dendritic innervation to the SEZ and no dendritic innervation in the AL                                                                                                                                                                                                                 |

<sup>a</sup> emb:embryonic-born; larval: larval-born

<sup>b, c, d</sup> see the description in the column of notes

<sup>e</sup> same types of PNs can be also seen in different classes of dendritic mis-targeting phenotypes in Tables 1 and 2
