# Supplementary material for: Semaphorin-1a prevents Drosophila olfactory projection neuron dendrites from mis-targeting into select antennal lobe regions
Source: PLOS journal article supplement (doi:10.1371/journal.pgen.1006751), 2017-04-27
Supplement: S13 (10.1371/journal.pgen.1006751.s013) [file journal.pgen.1006751.s013]

**S3 Table. Generation of specific types of adPNs in the *Sema-1a<sup>PI</sup>* mutant with ectopic *Sema-1a* expression in the synchronized MARCM experiment based on their birth-order**

genotype: *hs-FLP<sup>122</sup>/+;FRT<sup>40A</sup>,UAS-mCD8::GFP,Sema1a<sup>PI</sup>,GAL4-GH146/FRT<sup>40A</sup>,tub-GAL80;UAS-Sema-1a<sup>sy</sup>/+;*

| hr ALH<br>adPN | 26-30<br>(n=5) | 30-34<br>(n=24) | 34-38<br>(n=3) | 38-42<br>(n=16) | 42-46<br>(n=15) | 46-50<br>(n=15) | 50-54<br>(n=4) |
|----------------|----------------|-----------------|----------------|-----------------|-----------------|-----------------|----------------|
| DL1            | 60%            | 33%             | 0%             | 0%              | 0%              | 0%              | 0%             |
| DA3(DL3/DA4)   | 20%            | 38%             | 0%             | 6%              | 7%              | 0%              | 0%             |
| DC2            | 0%             | 8%              | 67%            | 6%              | 0%              | 0%              | 0%             |
| D              | 20%            | 21%             | 0%             | 31%             | 0%              | 13%             | 0%             |
| VA3            | 0%             | 0%              | 0%             | 13%             | 13%             | 7%              | 0%             |
| DC3            | 0%             | 0%              | 33%            | 25%             | 40%             | 60%             | 50%            |
| VA1d           | 0%             | 0%              | 0%             | 19%             | 40%             | 20%             | 50%            |
